# Supplementary material for: Recharging N95 masks using a van de Graaff generator for safe recycling
Source: Royal Society of Chemistry journal article supplement (doi:10.1039/d0sm02004d), 2020-12-17
Supplement: d0sm02004d1.pdf [file d0sm02004d1.pdf]

supplementary information

## Recharging N95 masks by van de Graaff generator for safe recycling

K. Sugihara\*

Institute of Industrial Science, The University of Tokyo, 4-6-1 Komaba Meguro-Ku, Tokyo

153-8505, Japan

Correspondence: kaori-s@iis.u-tokyo.ac.jp

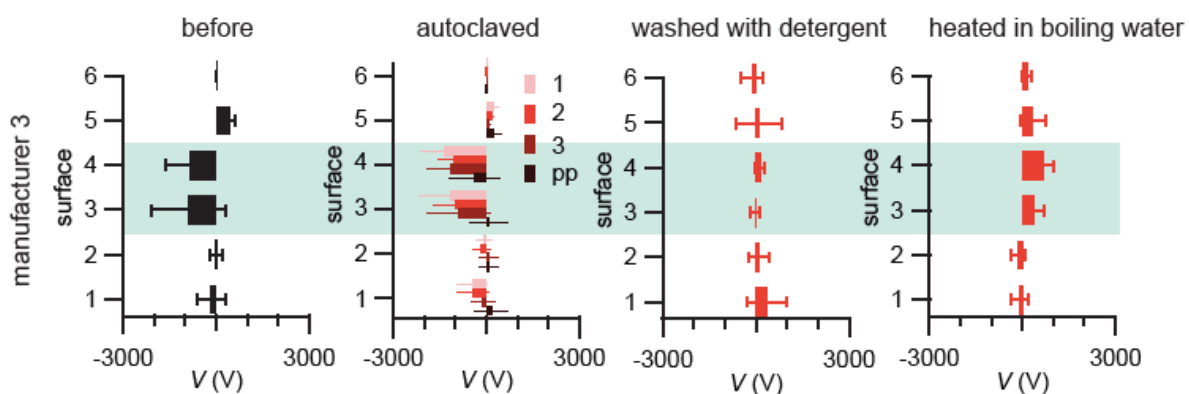

Figure 1: Results from masks from manufacturer 3. Voltages from the masks' static electricity measured before and after autoclaving, washing with detergent and color bleach, and steeping in boiling water are presented.
